# Supplementary material
Source: PubMed Central journal article supplement (PMC3544539)
Supplement: NIHMS396199-supplement-Supplement1.pdf [file NIHMS396199-supplement-Supplement1.pdf]

## Supplementary Appendix

This appendix has been provided by the authors to give readers additional information about their work.

Supplement to: Topalian SL, Hodi FS, Brahmer JR, et al. Safety, activity, and immune correlates of anti-PD-1 antibody in cancer. *N Engl J Med* 2012;366:2443-54. DOI: [10.1056/NEJMoa1200690](https://doi.org/10.1056/NEJMoa1200690).

**Supplementary appendices for “Safety, activity, and immune correlates of anti-PD-1 antibody in cancer patients” by Topalian et al.**

**Table of Contents of Supplementary Appendices**

| <b>Appendix</b>                                                                                                                        | <b>Page</b> |
|----------------------------------------------------------------------------------------------------------------------------------------|-------------|
| Methods S1. Definition of Tumor Response Terms per RECIST v1.0                                                                         | 2           |
| Table S1-A. Summary of Baseline Demographics and Prior Therapy                                                                         | 3           |
| Table S1-B. Baseline Characteristics and Prior Therapy of All Treated Patients With Non-Small-Cell Lung Cancer                         | 4           |
| Table S1-C. Baseline Characteristics and Prior Therapy of All Treated Patients With Melanoma                                           | 5           |
| Table S1-D. Baseline Characteristics and Prior Therapy of All Treated Patients With Renal-Cell Cancer                                  | 6           |
| Table S2-A. Summary of Exposure to Anti-PD-1 Antibody, All Treated Patient Population                                                  | 7           |
| Table S2-B. Summary of Patient Disposition, All Treated Patient Population                                                             | 8           |
| Table S2-C. Summary of Deaths, All Treated Patient Population                                                                          | 9           |
| Table S3-A. Adverse Events That Occurred in at Least 10% of the All Treated Patient Population                                         | 10          |
| Table S3-B. Anti-PD-1 Antibody-Related Adverse Events That Occurred in at Least 3% of the All Treated Patient Population               | 13          |
| Table S4. Anti-PD-1 Antibody-Related Serious Adverse Events That Occurred in at Least 2 Patients in the All Treated Patient Population | 15          |
| Table S5. Tumor Specimens Analyzed for PD-L1 Expression                                                                                | 17          |

**Supplementary appendices for “Safety, activity, and immune correlates of anti-PD-1 antibody in cancer patients” by Topalian et al.**

**Methods S1. Definition of Tumor Response Terms per RECIST v1.0**

Complete response (CR): disappearance of all target lesions

Partial response (PR): at least a 30% decrease in the sum of the largest diameter (LD) of target lesions taking as reference the baseline sum of the LDs

Stable disease (SD): neither a sufficient shrinkage to qualify for PR nor sufficient increase to qualify for progressive disease (PD) taking as reference the baseline sum of the LDs

Progressive disease: at least a 20% increase in the sum of LD of target lesions taking as reference the smallest LD recorded since the start of treatment or the appearance of one or more new lesions

Supplementary appendices for “Safety, activity, and immune correlates of anti-PD-1 antibody in cancer patients” by Topalian et al.

**Table S1-A. Summary of Baseline Demographics and Prior Therapy\***

| Variable                                  | All Treated Patient Population (N=296) | Efficacy Population <sup>†</sup> (N=236) |
|-------------------------------------------|----------------------------------------|------------------------------------------|
| Age - yr                                  |                                        |                                          |
| Median                                    | 63                                     | 62                                       |
| Range                                     | 29-85                                  | 29-85                                    |
| Sex – no. (%)                             |                                        |                                          |
| Male                                      | 195 (66)                               | 160 (68)                                 |
| Female                                    | 101 (34)                               | 76 (32)                                  |
| Tumor histology – no. (%)                 |                                        |                                          |
| Melanoma                                  | 104 (35)                               | 94 (40)                                  |
| Non-small-cell lung cancer                | 122 (41)                               | 76 (32)                                  |
| Squamous                                  | 47 (39)                                | 18 (24)                                  |
| Non-squamous                              | 73 (60)                                | 56 (74)                                  |
| Unknown                                   | 2 (2)                                  | 2 (3)                                    |
| Renal-cell cancer                         | 34 (11)                                | 33 (14)                                  |
| Castration-resistant prostate cancer      | 17 (6)                                 | 13 (6)                                   |
| Colorectal cancer                         | 19 (6)                                 | 19 (8)                                   |
| ECOG performance status – no. (%)         |                                        |                                          |
| 0                                         | 128 (43)                               | 108 (46)                                 |
| 1                                         | 158 (53)                               | 121 (51)                                 |
| 2                                         | 7 (2)                                  | 7 (3)                                    |
| Not reported                              | 3 (1)                                  | 0                                        |
| Number of prior therapies – no. (%)       |                                        |                                          |
| 1                                         | 71 (24)                                | 56 (24)                                  |
| 2                                         | 79 (27)                                | 65 (28)                                  |
| 3                                         | 54 (18)                                | 42 (18)                                  |
| ≥4                                        | 86 (29)                                | 73 (31)                                  |
| Not reported                              | 6 (2)                                  | 0                                        |
| Nature of prior therapy – no. (%)         |                                        |                                          |
| Chemotherapy                              | 238 (80)                               | 190 (81)                                 |
| Surgery                                   | 235 (79)                               | 192 (81)                                 |
| Radiotherapy                              | 144 (49)                               | 108 (46)                                 |
| Hormonal, immunologic or biologic therapy | 132 (45)                               | 117 (50)                                 |
| Other                                     | 35 (12)                                | 32 (14)                                  |

\*ECOG denotes Eastern Cooperative Oncology Group.

<sup>†</sup> The efficacy population consists of response-evaluable patients whose treatment was initiated by July 1, 2011 and had measurable disease at baseline and one of the following: at least 1 on-treatment scan or clinical evidence of disease progression or death.

Supplementary appendices for “Safety, activity, and immune correlates of anti-PD-1 antibody in cancer patients” by Topalian et al.

**Table S1-B. Baseline Characteristics and Prior Therapy of All Treated Patients With Non-Small-Cell Lung Cancer\***

| <b>Variable</b>                     | <b>Non-Small-Cell Lung Cancer Patients (n=122)</b> |
|-------------------------------------|----------------------------------------------------|
| Age - yr                            |                                                    |
| Median                              | 65                                                 |
| Range                               | 38-85                                              |
| Sex – no. (%)                       |                                                    |
| Male                                | 74 (61)                                            |
| Female                              | 48 (39)                                            |
| ECOG performance status – no. (%)   |                                                    |
| 0                                   | 34 (28)                                            |
| 1                                   | 83 (68)                                            |
| 2                                   | 2 (2)                                              |
| Not reported                        | 3 (2)                                              |
| Number of prior therapies – no. (%) |                                                    |
| 1                                   | 18 (15)                                            |
| 2                                   | 31 (25)                                            |
| 3                                   | 27 (22)                                            |
| ≥4                                  | 40 (33)                                            |
| Not reported                        | 6 (5)                                              |
| Nature of prior therapy – no. (%)   |                                                    |
| Platinum-based chemotherapy         | 115 (94)                                           |
| Tyrosine kinase inhibitor           | 41 (34)                                            |
| Lesions at baseline                 |                                                    |
| Bone                                | 21 (17)                                            |
| Liver                               | 24 (20)                                            |
| Lung                                | 107 (88)                                           |
| Lymph node                          | 81 (66)                                            |
| Other                               | 46 (38)                                            |

\*ECOG denotes Eastern Cooperative Oncology Group.

**Table S1-C. Baseline Characteristics and Prior Therapy of All Treated Patients With Melanoma\***

| <b>Variable</b>                     | <b>Melanoma Patients (n=104)</b> |
|-------------------------------------|----------------------------------|
| Age - yr                            |                                  |
| Median                              | 61                               |
| Range                               | 29-85                            |
| Sex – no. (%)                       |                                  |
| Male                                | 69 (66)                          |
| Female                              | 35 (34)                          |
| ECOG performance status – no. (%)   |                                  |
| 0                                   | 63 (61)                          |
| 1                                   | 38 (37)                          |
| 2                                   | 3 (3)                            |
| Number of prior therapies – no. (%) |                                  |
| 1                                   | 41 (39)                          |
| 2                                   | 36 (35)                          |
| 3                                   | 18 (17)                          |
| ≥4                                  | 9 (9)                            |
| Nature of prior therapy – no. (%)   |                                  |
| Immunotherapy                       | 67 (64)                          |
| B-RAF inhibitor                     | 8 (8)                            |
| Lesions at baseline                 |                                  |
| Bone                                | 13 (13)                          |
| Liver                               | 37 (36)                          |
| Lung                                | 63 (61)                          |
| Lymph node                          | 69 (66)                          |
| Other                               | 64 (62)                          |

\*ECOG denotes Eastern Cooperative Oncology Group.

**Table S1-D. Baseline Characteristics and Prior Therapy of All treated Patients With Renal-Cell Cancer\***

| <b>Variable</b>                     | <b>Renal-Cell Cancer Patients (n=34)</b> |
|-------------------------------------|------------------------------------------|
| Age - yr                            |                                          |
| Median                              | 58                                       |
| Range                               | 35-74                                    |
| Sex – no. (%)                       |                                          |
| Male                                | 26 (76)                                  |
| Female                              | 8 (24)                                   |
| ECOG performance status – no. (%)   |                                          |
| 0                                   | 13 (38)                                  |
| 1                                   | 21 (62)                                  |
| 2                                   | 0                                        |
| Number of prior therapies – no. (%) |                                          |
| 1                                   | 10 (29)                                  |
| 2                                   | 9 (26)                                   |
| 3                                   | 5 (15)                                   |
| ≥4                                  | 10 (29)                                  |
| Nature of prior therapy – no. (%)   |                                          |
| Surgery                             | 32 (94)                                  |
| Immunotherapy                       | 20 (59)                                  |
| Antiangiogenic therapy              | 25 (74)                                  |
| Lesions at baseline                 |                                          |
| Bone                                | 10 (29)                                  |
| Liver                               | 9 (26)                                   |
| Lung                                | 30 (88)                                  |
| Lymph node                          | 28 (82)                                  |
| Other                               | 20 (59)                                  |

\*ECOG denotes Eastern Cooperative Oncology Group.

**Table S2-A. Summary of Exposure to Anti-PD-1 Antibody, All Treated Patient Population**

| Variable                                       | Anti-PD-1 Dose, mg/kg |            |           |           |            | Total (N=296)  |
|------------------------------------------------|-----------------------|------------|-----------|-----------|------------|----------------|
|                                                | 0.1 (n=18)            | 0.3 (n=19) | 1 (n=79)  | 3 (n=50)  | 10 (n=130) |                |
| Duration of therapy (wk)                       |                       |            |           |           |            |                |
| Median                                         | 23.1                  | 17.0       | 16.1      | 17.5      | 14.3       | 16.0           |
| Range                                          | 8.0-51.4              | 4.0-43.0   | 2.0-100.0 | 2.0-101.3 | 2.0-121.7  | 2.0-121.7      |
| Dose intensity per patient (mg/kg/2 wk)*       |                       |            |           |           |            |                |
| Median                                         | 0.1                   | 0.3        | 1.0       | 2.9       | 9.8        | Not applicable |
| Range                                          | 0.1-0.8               | 0.2-1.0    | 0.6-1.1   | 1.0-3.7   | 0.9-11.0   | Not applicable |
| Relative dose-intensity – no. (%) of patients† |                       |            |           |           |            |                |
| ≥90%                                           | 18 (100)              | 17 (90)    | 68 (86)   | 40 (80)   | 111 (85)   | 254 (86)       |

\*Dose intensity per patient is the cumulative dose ÷ duration of therapy, in 2-week periods.

†Relative dose intensity is the dose intensity per patient ÷ planned dose per 2 weeks per patient.

**Table S2-B. Summary of Patient Disposition, All Treated Patient Population**

| Patient Disposition                                                             | Anti-PD-1 Dose, mg/kg |         |         |         |         | Total    |
|---------------------------------------------------------------------------------|-----------------------|---------|---------|---------|---------|----------|
|                                                                                 | 0.1                   | 0.3     | 1       | 3       | 10      |          |
|                                                                                 | No. (%) of Patients   |         |         |         |         |          |
| All treated patient population*                                                 | 18                    | 19      | 79      | 50      | 130     | 296      |
| Efficacy population†                                                            | 15                    | 16      | 62      | 36      | 107     | 236      |
| Study status‡                                                                   |                       |         |         |         |         |          |
| On study                                                                        | 10 (56)               | 11 (58) | 38 (48) | 24 (48) | 33 (25) | 116 (39) |
| Off study                                                                       | 8 (44)                | 8 (42)  | 41 (52) | 26 (52) | 97 (75) | 180 (61) |
| Key reasons for discontinuation from study                                      |                       |         |         |         |         |          |
| Disease progression                                                             | 6 (75)                | 4 (50)  | 20 (49) | 11 (42) | 46 (47) | 87 (48)  |
| Death (any cause)                                                               | 1 (13)                | 1 (13)  | 11 (27) | 6 (23)  | 22 (23) | 41 (23)  |
| Adverse event regardless of causality (including drug-related adverse events) § | 0                     | 3 (16)  | 10 (13) | 7 (14)  | 25 (19) | 45 (15)  |
| Drug-related adverse event §                                                    | 0                     | 0       | 3 (4)   | 2 (4)   | 10 (8)  | 15 (5)   |

\*As of February 24, 2012, the date of data analysis, a total of 381 patients were enrolled; 296 were treated and 85 were either screen failures or withdrew consent prior to initiation of treatment.

†Efficacy population consisted of response-evaluable patients who initiated treatment by July 1, 2011, had measurable disease at baseline and either at least 1 on-treatment scan or disease progression or death.

‡As of February 24, 2012, the date of data analysis.

§Data sourced from listing of adverse events leading to study drug discontinuation.

**Table S2-C. Summary of Deaths, All Treated Patient Population**

| <b>Parameter</b>                    | <b>All Treated Patients (N=296)</b> |
|-------------------------------------|-------------------------------------|
| Deaths – no. (%)                    | 62 (21)                             |
| Cause of death – no. (%)            |                                     |
| Disease                             | 46 (16)                             |
| Serious adverse event <sup>*†</sup> | 11 (4)                              |
| Study drug toxicity                 | 3 (1)                               |
| Other                               | 2 (1)                               |

<sup>\*</sup>Serious adverse event was defined as an adverse event that was fatal or life threatening, required hospitalization, or resulted in persistent or significant disability/incapacity and/or required medical or surgical intervention to prevent one of the outcomes listed above.

<sup>†</sup>None of these serious adverse events were reported as related to study drug by the investigators.

Supplementary appendices for “Safety, activity, and immune correlates of anti-PD-1 antibody in cancer patients” by Topalian et al.

**Table S3A. Adverse Events That Occurred in at Least 10% of the All Treated Patient Population \***

| Adverse Event                                           | Adverse Events, Regardless of Causality |            |            |           |            |            |            |            |             |            |               |             | Anti-PD-1 Related-Adverse Events <sup>†</sup> |            |
|---------------------------------------------------------|-----------------------------------------|------------|------------|-----------|------------|------------|------------|------------|-------------|------------|---------------|-------------|-----------------------------------------------|------------|
|                                                         | Anti-PD-1 Dose, mg/kg                   |            |            |           |            |            |            |            |             |            |               |             |                                               |            |
|                                                         | 0.1 (n=18)                              |            | 0.3 (n=19) |           | 1 (n=79)   |            | 3 (n=50)   |            | 10 (n=130)  |            | Total (N=296) |             | Total (N=296)                                 |            |
|                                                         | All Gr                                  | Gr 3-4     | All Gr     | Gr 3-4    | All Gr     | Gr 3-4     | All Gr     | Gr 3-4     | All Gr      | Gr 3-4     | All Gr        | Gr 3-4      | All Gr                                        | Gr 3-4     |
| No. (%) of Patients per Cohort                          |                                         |            |            |           |            |            |            |            |             |            |               |             |                                               |            |
| Any adverse event <sup>‡</sup>                          | 18<br>(100)                             | 11<br>(61) | 17<br>(90) | 5<br>(26) | 74<br>(94) | 34<br>(43) | 48<br>(96) | 26<br>(52) | 129<br>(99) | 70<br>(54) | 286<br>(97)   | 146<br>(49) | 207<br>(70)                                   | 41<br>(14) |
| <i>General disorders</i>                                |                                         |            |            |           |            |            |            |            |             |            |               |             |                                               |            |
| Fatigue                                                 | 10<br>(56)                              | 2<br>(11)  | 8<br>(42)  | -         | 35<br>(44) | 6<br>(8)   | 23<br>(46) | 1<br>(2)   | 70<br>(54)  | 7<br>(5)   | 146<br>(49)   | 16<br>(5)   | 72<br>(24)                                    | 5<br>(2)   |
| Pyrexia                                                 | 3<br>(17)                               | -          | 2<br>(11)  | -         | 13<br>(17) | -          | 6<br>(12)  | -          | 28<br>(22)  | 1<br>(1)   | 52<br>(18)    | 1<br>(0.3)  | 16<br>(5)                                     | -          |
| Edema peripheral                                        | 4<br>(22)                               | 1<br>(6)   | 2<br>(11)  | -         | 18<br>(23) | -          | 6<br>(12)  | -          | 20<br>(15)  | -          | 50<br>(17)    | 1<br>(0.3)  | 2<br>(1)                                      | -          |
| <i>Gastrointestinal disorders</i>                       |                                         |            |            |           |            |            |            |            |             |            |               |             |                                               |            |
| Diarrhea                                                | 3<br>(17)                               | -          | 2<br>(11)  | -         | 30<br>(38) | -          | 12<br>(24) | -          | 36<br>(28)  | 3<br>(2)   | 83<br>(28)    | 3<br>(1)    | 33<br>(11)                                    | 3<br>(1)   |
| Nausea                                                  | 4<br>(22)                               | 1<br>(6)   | 3<br>(16)  | -         | 18<br>(23) | 1<br>(1)   | 14<br>(28) | -          | 41<br>(32)  | 5<br>(4)   | 80<br>(27)    | 7<br>(2)    | 24<br>(8)                                     | 1<br>(0.3) |
| Constipation                                            | 8<br>(44)                               | 1<br>(6)   | 3<br>(16)  | -         | 16<br>(20) | -          | 11<br>(22) | -          | 27<br>(21)  | -          | 65<br>(22)    | 1<br>(0.3)  | 5<br>(2)                                      | -          |
| Vomiting                                                | 4<br>(22)                               | 1<br>(6)   | 3<br>(16)  | -         | 13<br>(17) | -          | 10<br>(20) | 1<br>(2)   | 35<br>(27)  | 4<br>(3)   | 65<br>(22)    | 6<br>(2)    | 9<br>(3)                                      | 1<br>(0.3) |
| <i>Respiratory, thoracic, and mediastinal disorders</i> |                                         |            |            |           |            |            |            |            |             |            |               |             |                                               |            |
| Cough                                                   | 5<br>(28)                               | -          | 2<br>(11)  | -         | 18<br>(23) | 2<br>(3)   | 11<br>(22) | 1<br>(2)   | 38<br>(29)  | 1<br>(1)   | 74<br>(25)    | 4<br>(1)    | 8<br>(3)                                      | 1<br>(0.3) |
| Dyspnea                                                 | 1<br>(6)                                | 1<br>(6)   | 2<br>(11)  | 1<br>(5)  | 20<br>(25) | 5<br>(6)   | 12<br>(24) | 2<br>(4)   | 30<br>(23)  | 14<br>(11) | 65<br>(22)    | 23<br>(8)   | 7<br>(2)                                      | -          |
| <i>Musculoskeletal and connective tissue disorders</i>  |                                         |            |            |           |            |            |            |            |             |            |               |             |                                               |            |
| Back pain                                               | 5<br>(28)                               | -          | 1<br>(5)   | -         | 9<br>(11)  | -          | 7<br>(14)  | -          | 28<br>(22)  | 5<br>(4)   | 50<br>(17)    | 5<br>(2)    | 1<br>(0.3)                                    | 1<br>(0.3) |
| Arthralgia                                              | 7<br>(39)                               | 1<br>(6)   | 2<br>(11)  | -         | 13<br>(17) | -          | 9<br>(18)  | -          | 17<br>(13)  | 2<br>(2)   | 48<br>(16)    | 3<br>(1)    | 13<br>(4)                                     | -          |

Supplementary appendices for “Safety, activity, and immune correlates of anti-PD-1 antibody in cancer patients” by Topalian et al.

|                                                      |           |          |           |          |            |          |            |          |            |          |            |            |            |            |
|------------------------------------------------------|-----------|----------|-----------|----------|------------|----------|------------|----------|------------|----------|------------|------------|------------|------------|
| Musculoskeletal pain                                 | 2<br>(11) | -        | -         | -        | 8<br>(10)  | 2<br>(3) | 5<br>(10)  | 1<br>(2) | 18<br>(14) | 3<br>(2) | 33<br>(11) | 6<br>(2)   | 7<br>(2)   | 1<br>(0.3) |
| Pain in extremity                                    | 4<br>(22) | 1<br>(6) | 1<br>(5)  | -        | 8<br>(10)  | -        | 4<br>(8)   | -        | 13<br>(10) | 3<br>(2) | 30<br>(10) | 4<br>(1)   | 7<br>(2)   | -          |
| <b><i>Metabolism and nutrition disorders</i></b>     |           |          |           |          |            |          |            |          |            |          |            |            |            |            |
| Decreased appetite                                   | 7<br>(39) | 1<br>(6) | 7<br>(37) | -        | 25<br>(32) | -        | 12<br>(24) | -        | 41<br>(32) | -        | 92<br>(31) | 1<br>(0.3) | 24<br>(8)  | -          |
| Hyperglycemia                                        | 4<br>(22) | -        | 2<br>(11) | -        | 15<br>(19) | 1<br>(1) | 4<br>(8)   | -        | 8<br>(6)   | 1<br>(1) | 33<br>(11) | 2<br>(1)   | 2<br>(1)   | -          |
| Dehydration                                          | 2<br>(11) | 1<br>(6) | 1<br>(5)  | 1<br>(5) | 6<br>(8)   | 2<br>(3) | 2<br>(4)   | -        | 17<br>(13) | 4<br>(3) | 28<br>(10) | 8<br>(3)   | 2<br>(1)   | 1<br>(0.3) |
| <b><i>Skin and subcutaneous tissue disorders</i></b> |           |          |           |          |            |          |            |          |            |          |            |            |            |            |
| Rash                                                 | 3<br>(17) | -        | 3<br>(16) | -        | 21<br>(27) | -        | 11<br>(22) | -        | 22<br>(17) | -        | 60<br>(20) | -          | 36<br>(12) | -          |
| Pruritus                                             | -         | -        | 5<br>(26) | -        | 17<br>(22) | -        | 6<br>(12)  | -        | 15<br>(12) | 1 (1)    | 43<br>(15) | 1<br>(0.3) | 28<br>(10) | 1<br>(0.3) |
| Vitiligo                                             | 3<br>(17) | -        | -         | -        | 3<br>(4)   | -        | 2<br>(4)   | -        | -          | -        | 8<br>(3)   | -          | 8<br>(3)   | -          |
| <b><i>Nervous system disorders</i></b>               |           |          |           |          |            |          |            |          |            |          |            |            |            |            |
| Headache                                             | 4<br>(22) | 1<br>(6) | 5<br>(26) | -        | 12<br>(15) | -        | 9<br>(18)  | -        | 22<br>(17) | -        | 52<br>(18) | 1<br>(0.3) | 8<br>(3)   | -          |
| Dizziness                                            | 3<br>(17) | -        | 3<br>(16) | -        | 12<br>(15) | -        | 8<br>(16)  | 1<br>(2) | 20<br>(15) | -        | 46<br>(16) | 1<br>(0.3) | 9<br>(3)   | -          |
| <b><i>Investigations</i></b>                         |           |          |           |          |            |          |            |          |            |          |            |            |            |            |
| Weight decreased                                     | 4<br>(22) | -        | 2<br>(11) | -        | 9<br>(11)  | -        | 6<br>(12)  | 1<br>(2) | 22<br>(17) | -        | 43<br>(15) | 1<br>(0.3) | 10<br>(3)  | -          |
| Hemoglobin decreased                                 | 3<br>(17) | -        | 4<br>(21) | -        | 10<br>(13) | -        | 5<br>(10)  | -        | 14<br>(11) | 2<br>(2) | 36<br>(12) | 2<br>(1)   | 19<br>(6)  | 1<br>(0.3) |
| <b><i>Psychiatric disorders</i></b>                  |           |          |           |          |            |          |            |          |            |          |            |            |            |            |
| Insomnia                                             | 2<br>(11) | -        | 3<br>(16) | -        | 10<br>(13) | -        | 9<br>(18)  | 1<br>(2) | 16<br>(12) | -        | 40<br>(14) | 1<br>(0.3) | -          | -          |
| <b><i>Vascular disorders</i></b>                     |           |          |           |          |            |          |            |          |            |          |            |            |            |            |
| Hypotension                                          | 2<br>(11) | -        | 1<br>(5)  | -        | 5<br>(6)   | -        | 6<br>(12)  | 1<br>(2) | 16<br>(12) | 3<br>(2) | 30<br>(10) | 4<br>(1)   | 7<br>(2)   | -          |
| <b><i>Neoplasms</i></b>                              |           |          |           |          |            |          |            |          |            |          |            |            |            |            |
| Neoplasm malignant                                   | 3<br>(17) | -        | -         | -        | 10<br>(13) | 3<br>(4) | 2<br>(4)   | 2<br>(4) | 19<br>(15) | 3<br>(2) | 34<br>(12) | 8<br>(3)   | 1<br>(0.3) | 1<br>(0.3) |

Supplementary appendices for “Safety, activity, and immune correlates of anti-PD-1 antibody in cancer patients” by Topalian et al.

| <i>Blood and lymphatic system disorders</i>                        |          |   |           |   |            |          |           |   |            |          |            |          |           |   |
|--------------------------------------------------------------------|----------|---|-----------|---|------------|----------|-----------|---|------------|----------|------------|----------|-----------|---|
| Anemia                                                             | 1<br>(6) | - | 2<br>(11) | - | 6<br>(8)   | 3<br>(4) | 4<br>(8)  | - | 17<br>(13) | 3<br>(2) | 30<br>(10) | 6<br>(2) | 3<br>(1)  | - |
| <b>Adverse events of any grade leading to drug discontinuation</b> | -        |   | 3<br>(16) |   | 10<br>(13) |          | 7<br>(14) |   | 25<br>(19) |          | 45<br>(15) |          | 15<br>(5) |   |

\*Gr denotes grade.

†Anti-PD-1-related adverse events as identified by investigators for those events that were reported in at least 10% of the all treated patient population. See Table S3B for anti-PD-1-related adverse events that occurred in at least 3% of the all treated patient population.

‡Note: The numbers reported within a column may not add up to the total number reported under “any adverse event” because (i) patients who had more than 1 adverse event were counted for each event but were counted only once for “any adverse event” and (ii) data for only those events that were reported in at least 10% of the all treated patient population are presented in this table.

Supplementary appendices for “Safety, activity, and immune correlates of anti-PD-1 antibody in cancer patients” by Topalian et al.

Table S3B. Anti-PD-1 Antibody-Related Adverse Events That Occurred in at Least 3% of the All Treated Patient Population \*

| Drug-Related Adverse Event                    | Anti-PD-1 Dose, mg/kg |        |            |        |          |         |          |        |            |         | Total (N=296) |         |
|-----------------------------------------------|-----------------------|--------|------------|--------|----------|---------|----------|--------|------------|---------|---------------|---------|
|                                               | 0.1 (n=18)            |        | 0.3 (n=19) |        | 1 (n=79) |         | 3 (n=50) |        | 10 (n=130) |         |               |         |
|                                               | All Gr                | Gr 3-4 | All Gr     | Gr 3-4 | All Gr   | Gr 3-4  | All Gr   | Gr 3-4 | All Gr     | Gr 3-4  | All Gr        | Gr 3-4  |
| No. (%) of Patients per Cohort                |                       |        |            |        |          |         |          |        |            |         |               |         |
| <b>Any adverse event<sup>†</sup></b>          | 14 (78)               | 3 (17) | 11 (58)    | 2 (11) | 59 (75)  | 10 (13) | 34 (68)  | 8 (16) | 89 (69)    | 18 (14) | 207 (70)      | 41 (14) |
| <b>General disorders</b>                      |                       |        |            |        |          |         |          |        |            |         |               |         |
| Fatigue                                       | 4 (22)                | 1 (6)  | 5 (26)     | -      | 19 (24)  | 2 (3)   | 12 (24)  | -      | 32 (25)    | 2 (2)   | 72 (24)       | 5 (2)   |
| Pyrexia                                       | 1 (6)                 | -      | 1 (5)      | -      | 6 (8)    | -       | 2 (4)    | -      | 6 (5)      | -       | 16 (5)        | -       |
| <b>Skin and subcutaneous tissue disorders</b> |                       |        |            |        |          |         |          |        |            |         |               |         |
| Rash                                          | 3 (17)                | -      | 2 (11)     | -      | 16 (20)  | -       | 4 (8)    | -      | 11 (9)     | -       | 36 (12)       | -       |
| Pruritus                                      | -                     | -      | 2 (11)     | -      | 13 (17)  | -       | 4 (8)    | -      | 9 (7)      | 1 (1)   | 28 (10)       | 1 (0.3) |
| Vitiligo                                      | 3 (17)                | -      | -          | -      | 3 (4)    | -       | 2 (4)    | -      | -          | -       | 8 (3)         | -       |
| <b>Gastrointestinal disorders</b>             |                       |        |            |        |          |         |          |        |            |         |               |         |
| Diarrhea                                      | 1 (6)                 | -      | 2 (11)     | -      | 15 (19)  | -       | 3 (6)    | -      | 12 (9)     | 3 (2)   | 33 (11)       | 3 (1)   |
| Nausea                                        | -                     | -      | 1 (5)      | -      | 5 (6)    | -       | 7 (14)   | -      | 11 (9)     | 1 (1)   | 24 (8)        | 1 (0.3) |
| Dry mouth                                     | -                     | -      | -          | -      | 4 (5)    | 1 (1)   | 2 (4)    | -      | 4 (3)      | -       | 10 (3)        | 1 (0.3) |
| Abdominal pain                                | -                     | -      | -          | -      | 4 (5)    | -       | 1 (2)    | 1 (2)  | 4 (3)      | 2 (2)   | 9 (3)         | 3 (1)   |
| Vomiting                                      | -                     | -      | 1 (5)      | -      | 1 (1)    | -       | 2 (4)    | -      | 5 (4)      | 1 (1)   | 9 (3)         | 1 (0.3) |
| <b>Investigations</b>                         |                       |        |            |        |          |         |          |        |            |         |               |         |
| Hemoglobin decreased                          | 2 (11)                | -      | 3 (16)     | -      | 4 (5)    | -       | 2 (4)    | -      | 8 (6)      | 1 (1)   | 19 (6)        | 1 (0.3) |
| Alanine aminotransferase increased            | -                     | -      | 1 (5)      | -      | 4 (5)    | -       | 2 (4)    | -      | 4 (3)      | 2 (2)   | 11 (4)        | 2 (1)   |
| Weight decreased                              | 1 (6)                 | -      | 2 (11)     | -      | 2 (3)    | -       | 3 (6)    | -      | 2 (2)      | -       | 10 (3)        | -       |
| Blood thyroid stimulating hormone increased   | 2 (11)                | -      | -          | -      | 2 (3)    | -       | 2 (4)    | -      | 3 (2)      | 1 (1)   | 9 (3)         | 1 (0.3) |
| Aspartate aminotransferase increased          | -                     | -      | 1 (5)      | -      | 2 (3)    | -       | 2 (4)    | 1 (2)  | 3 (2)      | 1 (1)   | 8 (3)         | 2 (1)   |
| <b>Metabolism and nutrition disorders</b>     |                       |        |            |        |          |         |          |        |            |         |               |         |
| Decreased appetite                            | 1 (6)                 | -      | 2 (11)     | -      | 6 (8)    | -       | 5 (10)   | -      | 10 (8)     | -       | 24 (8)        | -       |
| Hypophosphatemia                              | -                     | -      | -          | -      | 3 (4)    | 1 (1)   | 3 (6)    | -      | 4 (3)      | 2 (2)   | 10 (3)        | 3 (1)   |
| Hyperuricemia                                 | 1 (6)                 | -      | 1 (5)      | 1 (5)  | 5 (6)    | -       | 1 (2)    | -      | -          | -       | 8 (3)         | 1 (0.3) |

Supplementary appendices for “Safety, activity, and immune correlates of anti-PD-1 antibody in cancer patients” by Topalian et al.

|                                                                |       |   |        |       |       |       |       |       |       |       |        |         |
|----------------------------------------------------------------|-------|---|--------|-------|-------|-------|-------|-------|-------|-------|--------|---------|
| <b><i>Musculoskeletal disorders</i></b>                        |       |   |        |       |       |       |       |       |       |       |        |         |
| Arthralgia                                                     | 1 (6) | - | 1 (5)  | -     | 5 (6) | -     | 3 (6) | -     | 3 (2) | -     | 13 (4) | -       |
| <b><i>Respiratory, thoracic, and mediastinal disorders</i></b> |       |   |        |       |       |       |       |       |       |       |        |         |
| Pneumonitis                                                    | -     | - | -      | -     | 3 (4) | 2 (3) | 1 (2) | -     | 5 (4) | 1 (1) | 9 (3)  | 3 (1)   |
| Cough                                                          | 1 (6) | - | -      | -     | 3 (4) | 1 (1) | 2 (4) | -     | 2 (2) | -     | 8 (3)  | 1 (0.3) |
| <b><i>Nervous system disorders</i></b>                         |       |   |        |       |       |       |       |       |       |       |        |         |
| Dizziness                                                      | -     | - | 1 (5)  | -     | 1 (1) | -     | -     | -     | 7 (5) | -     | 9 (3)  | -       |
| Headache                                                       | -     | - | 1 (5)  | -     | 2 (3) | -     | -     | -     | 5 (4) | -     | 8 (3)  | -       |
| <b><i>Blood and lymphatic system disorders</i></b>             |       |   |        |       |       |       |       |       |       |       |        |         |
| Lymphopenia                                                    | 1 (6) | - | 2 (11) | 1 (5) | 1 (1) | -     | 3 (6) | 2 (4) | 3 (2) | -     | 10 (3) | 3 (1)   |

\*Gr denotes grade.

†Note: The numbers reported within a column may not add up to the total number reported under “any adverse event” because (i) patients who had more than 1 adverse event were counted for each event but were counted only once for “any adverse event” and (ii) data for only those events that were reported in at least 3% of the all treated patient population are presented in this table.

**Table S4. Anti-PD-1 Antibody-Related Serious Adverse Events That Occurred in at Least 2 Patients in the All Treated Patient Population\***

| Serious Adverse Event <sup>†</sup>        | Anti-PD-1 Dose, mg/kg |        |            |        |          |        |          |        |            |         | Total (N=296) |         |
|-------------------------------------------|-----------------------|--------|------------|--------|----------|--------|----------|--------|------------|---------|---------------|---------|
|                                           | 0.1 (n=18)            |        | 0.3 (n=19) |        | 1 (n=79) |        | 3 (n=50) |        | 10 (n=130) |         |               |         |
|                                           | All Gr                | Gr 3-4 | All Gr     | Gr 3-4 | All Gr   | Gr 3-4 | All Gr   | Gr 3-4 | All Gr     | Gr 3-4  | All Gr        | Gr 3-4  |
| No. (%) of Patients per Cohort            |                       |        |            |        |          |        |          |        |            |         |               |         |
| Any serious adverse event <sup>‡</sup>    | -                     | -      | -          | -      | 5 (6)    | 5 (6)  | 7 (14)   | 4 (8)  | 20 (15)    | 13 (10) | 32 (11)       | 22 (7)  |
| <b><i>Respiratory disorders</i></b>       |                       |        |            |        |          |        |          |        |            |         |               |         |
| Pneumonitis                               | -                     | -      | -          | -      | 2 (3)    | 2 (3)  | -        | -      | 4 (3)      | 1 (1)   | 6 (2)         | 3 (1)   |
| <b><i>General disorder</i></b>            |                       |        |            |        |          |        |          |        |            |         |               |         |
| Pyrexia                                   | -                     | -      | -          | -      | 1 (1)    | -      | 1 (2)    | -      | 1 (1)      | -       | 3 (1)         | -       |
| <b><i>Infections and infestations</i></b> |                       |        |            |        |          |        |          |        |            |         |               |         |
| Pneumonia                                 | -                     | -      | -          | -      | -        | -      | 1 (2)    | 1 (2)  | 1 (1)      | 1 (1)   | 2 (1)         | 2 (1)   |
| Sepsis                                    | -                     | -      | -          | -      | 1 (1)    | -      | -        | -      | 1 (1)      | -       | 2 (1)         | -       |
| <b><i>Investigations</i></b>              |                       |        |            |        |          |        |          |        |            |         |               |         |
| Alanine aminotransferase increased        | -                     | -      | -          | -      | -        | -      | 1 (2)    | -      | 1 (1)      | 1 (1)   | 2 (1)         | 1 (0.3) |
| Aspartate aminotransferase increased      | -                     | -      | -          | -      | -        | -      | 1 (2)    | 1 (2)  | 1 (1)      | -       | 2 (1)         | 1 (0.3) |
| Blood alkaline phosphatase increased      | -                     | -      | -          | -      | 1 (1)    | 1 (1)  | -        | -      | 1 (1)      | -       | 2 (1)         | 1 (0.3) |
| Lipase increased                          | -                     | -      | -          | -      | 1 (1)    | 1 (1)  | -        | -      | 1 (1)      | 1 (1)   | 2 (1)         | 2 (1)   |
| <b><i>Endocrine disorders</i></b>         |                       |        |            |        |          |        |          |        |            |         |               |         |
| Hypothyroidism                            | -                     | -      | -          | -      | -        | -      | -        | -      | 2(2)       | 1 (1)   | 2 (1)         | 1 (0.3) |
| <b><i>Gastrointestinal disorders</i></b>  |                       |        |            |        |          |        |          |        |            |         |               |         |
| Diarrhea                                  | -                     | -      | -          | -      | -        | -      | -        | -      | 4 (3)      | 3 (2)   | 4 (1)         | 3 (1)   |
| Nausea                                    | -                     | -      | -          | -      | -        | -      | -        | -      | 2 (2)      | 1 (1)   | 2 (1)         | 1 (0.3) |
| Vomiting                                  | -                     | -      | -          | -      | -        | -      | -        | -      | 2 (2)      | 1 (1)   | 2 (1)         | 1 (0.3) |

**Supplementary appendices for “Safety, activity, and immune correlates of anti-PD-1 antibody in cancer patients” by Topalian et al.**

| <i>Hepatobiliary disorder</i> |   |   |   |   |   |   |       |       |       |   |       |         |
|-------------------------------|---|---|---|---|---|---|-------|-------|-------|---|-------|---------|
| Hepatitis                     | - | - | - | - | - | - | 1 (2) | 1 (2) | 1 (1) | - | 2 (1) | 1 (0.3) |

\*Gr denotes grade.

†Serious adverse event was defined as an adverse event that was fatal or life threatening, required hospitalization, or resulted in persistent or significant disability/incapacity and/or required medical or surgical intervention to prevent one of the outcomes listed above.

‡Note: The numbers reported within a column may not add up to the total number reported under “any serious adverse event” because (i) patients who had more than 1 adverse event were counted for each event but were counted only once for “any serious adverse event” and (ii) data for only those events that were reported in at least 2 patients are presented in this table.

Supplementary appendices for “Safety, activity, and immune correlates of anti-PD-1 antibody in cancer patients” by Topalian et al.

**Table S5. Tumor Specimens Analyzed for PD-L1 Expression \***

| Tumor Type | Dose (mg/kg) | Patient Number | Patient PD-L1 Status (pos/neg) <sup>†</sup> | Clinical Response (CR/PR/NR) | Tumor Site                     | PD-L1 Expression (% pos tumor cells) |
|------------|--------------|----------------|---------------------------------------------|------------------------------|--------------------------------|--------------------------------------|
| MEL        | 0.1          | 1              | pos                                         | NR                           | Subcutaneous met 1             | 5-10                                 |
|            |              |                |                                             |                              | Subcutaneous met 2             | 0                                    |
| MEL        | 0.1          | 2              | pos                                         | NR                           | Cutaneous primary <sup>‡</sup> | 20                                   |
|            |              |                |                                             |                              | Lymph node met                 | 0                                    |
| MEL        | 0.1          | 3              | pos                                         | NR                           | Lymph node met                 | 5                                    |
| MEL        | 0.1          | 4              | pos                                         | PR                           | Ocular primary                 | 5                                    |
| MEL        | 0.3          | 5              | pos                                         | NR                           | Lung met                       | 5-10                                 |
| MEL        | 0.3          | 6              | pos                                         | NR <sup>§</sup>              | Cutaneous primary              | 40                                   |
| MEL        | 1            | 7              | neg                                         | NR                           | Cutaneous primary              | 0                                    |
| MEL        | 1            | 8              | neg                                         | NR                           | Cutaneous primary              | 0                                    |
| MEL        | 1            | 9              | pos                                         | PR                           | Lymph node met                 | 15                                   |
| MEL        | 3            | 10             | pos                                         | NR                           | Breast met                     | 10                                   |
| MEL        | 3            | 11             | neg                                         | NR                           | Ocular primary                 | 0                                    |
| MEL        | 3            | 12             | pos                                         | PR                           | Cutaneous met                  | 5                                    |
| MEL        | 3            | 13             | pos                                         | CR                           | Cutaneous primary              | 5                                    |
|            |              |                |                                             |                              | Subcutaneous met               | 0                                    |
|            |              |                |                                             |                              | Lymph node met                 | 0                                    |
| MEL        | 10           | 14             | pos                                         | NR                           | Cutaneous primary              | 5                                    |
|            |              |                |                                             |                              | Lymph node met 1               | 0                                    |
|            |              |                |                                             |                              | Lymph node met 2               | 5                                    |
| MEL        | 10           | 15             | pos                                         | PR                           | Lymph node met                 | 5                                    |
| MEL        | 10           | 16             | pos                                         | NR                           | Gall bladder met               | 5                                    |
|            |              |                |                                             |                              | Subcutaneous met 1             | 0                                    |
|            |              |                |                                             |                              | Subcutaneous met 2             | 0                                    |

**Supplementary appendices for “Safety, activity, and immune correlates of anti-PD-1 antibody in cancer patients” by Topalian et al.**

|       |    |    |     |                 |                  |    |
|-------|----|----|-----|-----------------|------------------|----|
|       |    |    |     |                 | Lymph node met 1 | 0  |
|       |    |    |     |                 | Lymph node met 2 | 0  |
| MEL   | 10 | 17 | pos | PR              | Lung met 1       | 5  |
|       |    |    |     |                 | Lung met 2       | 50 |
| MEL   | 10 | 18 | pos | NR <sup>§</sup> | Lymph node met   | 10 |
| NSCLC | 1  | 19 | neg | NR              | Lymph node met   | 0  |
| NSCLC | 1  | 20 | pos | NR              | Lung primary     | 10 |
| NSCLC | 1  | 21 | neg | NR              | Lung primary     | 0  |
| NSCLC | 3  | 22 | neg | NR              | Lung primary 1   | 0  |
|       |    |    |     |                 | Lung primary 2   | 0  |
| NSCLC | 3  | 23 | neg | NR              | Lung primary     | 0  |
|       |    |    |     |                 | Bone met         | 0  |
| NSCLC | 10 | 24 | pos | NR              | Lung primary     | 5  |
| NSCLC | 10 | 25 | neg | NR              | Lung primary     | 0  |
| NSCLC | 10 | 26 | pos | NR              | Brain met        | 20 |
| NSCLC | 10 | 27 | pos | NR              | Lung primary     | 5  |
| NSCLC | 10 | 28 | pos | PR              | Lung met         | 10 |
| CRC   | 10 | 29 | neg | NR              | Peritoneal met   | 0  |
| CRC   | 10 | 30 | pos | NR              | Colon primary 1  | 0  |
|       |    |    |     |                 | Colon primary 2  | 5  |
| CRC   | 10 | 31 | neg | NR              | Colon primary    | 0  |
| CRC   | 10 | 32 | neg | NR              | Colon primary 1  | 0  |
|       |    |    |     |                 | Colon primary 2  | 0  |
|       |    |    |     |                 | Liver met        | 0  |
| CRC   | 10 | 33 | neg | NR              | Colon primary    | 0  |
| CRC   | 10 | 34 | neg | NR              | Colon primary    | 0  |

**Supplementary appendices for “Safety, activity, and immune correlates of anti-PD-1 antibody in cancer patients” by Topalian et al.**

|      |    |    |     |    |                  |    |
|------|----|----|-----|----|------------------|----|
| CRC  | 10 | 35 | neg | NR | Colon primary    | 0  |
| RCC  | 10 | 36 | pos | PR | Kidney primary   | 60 |
| RCC  | 10 | 37 | pos | CR | Kidney primary   | 5  |
|      |    |    |     |    | Lymph node met 1 | 10 |
|      |    |    |     |    | Lymph node met 2 | 5  |
| RCC  | 10 | 38 | pos | NR | Kidney primary   | 10 |
| RCC  | 10 | 39 | pos | NR | Lung met         | 10 |
|      |    |    |     |    | Lymph node met   | 5  |
| RCC  | 10 | 40 | neg | NR | Kidney primary   | 0  |
| CRPC | 10 | 41 | neg | NR | Prostate primary | 0  |
| CRPC | 10 | 42 | neg | NR | Prostate primary | 0  |

\*CR denotes complete response, CRC colorectal cancer, CRPC castration-resistant prostate cancer, MEL melanoma, met metastasis, neg negative, NR non-responder, NSCLC non-small-cell lung cancer, pos positive, RCC renal-cell cancer.

†A patient was considered PD-L1 positive if any tumor biopsy was positive (see Methods).

‡Primary denotes primary tumor lesion.

§Two patients categorized as non-responders at the time of data analysis are still under evaluation.
